# Supplementary material
Source: publisher site journal article supplement (https://www.dovepress.com/article/309303)
Supplement: Supplementary file 1 [file get_supplementary_file.php]

**Exploring PI3Kδ molecular pathways in stable and AECOPD recovery, two randomised controlled trials**

Malcolm Begg, J Nicole Hamblin, Emily Jarvis, Glyn Bradley, Stephen Mark, David Michalovich, Mark Lennon, Hannah Wajdner, Augustin Amour, Robert Wilson, Ken Saunders, Rikako Tanaka, Saki Arai, Teresa Tang, Cedric Van Holsbeke, Jan De Backer, Wim Vos, Ingrid L Titlestad, Mark FitzGerald, Kieran Killian, Jean Bourbeau, Claude Poirier, François Maltais, Anthony Cahn, Edith M Hessel

**Supplementary Materials**

**Supplementary Methods**

**Details on Randomisation and Blinding Procedures (Study A and B)**

Subjects were assigned to treatments in accordance with the randomisation schedule generated by Clinical Statistics (GSK), prior to the start of the study, using validated internal software; Randall NG. A centre-based randomisation was used with a block size of 4. Following screening, centres contacted GSK’s interactive voice recognition system (IVRS) where the Randomisation and Medication Ordering System (RAMOS NG) would provide the appropriate the randomisation number and appropriate container code for the drug substance held at site. The centre, Investigator, and subject were blinded throughout the study.

**Device Information (Study B)**

Due to discontinuation in the manufacture of the DISKUS device while the recruitment was ongoing, a device and formulation change from DISKUS (containing a blend with lactose) to ELLIPTA (dual strip; containing a blend with lactose and 0.6% magnesium stearate) was made with protocol amendment # 04. A 1000 µg DISKUS dose is equivalent to 700 µg ELLIPTA dose in terms of the dose deposited within the lungs and retained over the daily dosing interval.1 Therefore, ELLIPTA was provided as three devices including a 500 µg, 100 µg and an additional 100 µg to provide a total daily dose of 700 µg (due to availability of blend strengths in the ELLIPTA device). All subjects initiated and completed the dosing using a single device/formulation of the drug product and no switching of individual patients occurred during the study.

**Detailed Methodology for Induced Sputum handling**

All centres in both studies followed a single sputum processing protocol, with training occurring at the Investigator meeting. All plasticware was DNAase and RNAase free. Following the induction of sputum by inhaled saline, the sputum plug was transferred to a pre-weighed 15 ml centrifuge tube. Minimum sputum weight for processing was 0.1g. Sample was then incubated in sterile PBS at a ratio of 8ml PBS to 1 g sputum. Sample was vortexed for 15 secs before being gently agitated on a rolling mixer for 15 mins. Sample was centrifuged at 790 g for 10 mins at 4oC. Supernatant was removed and transferred to 1.8 ml tubes for downstream cytokine analysis and frozen immediately at -80oC.

Sputum plug was then resuspended in DTT at a ratio of 4 ml 0.2% DTT to 1 g sputum, vortexed for 15 secs before being gently agitated on a rolling mixer for 15 mins. Sample was filtered into a fresh 15ml tube using a 100 µm pore nylon mesh. The filtrate was centrifuged at 790 g for 10 mins at 4oC. The supernatant was removed at the cell pellet resuspended in 1 ml cold PBS.

A 10 µl aliquot was removed at mixed with 10 µl 0.4% Trypan Blue, and transferred to a haemocytometer for cell counting. 100 cells were counted and the number of viable and dead leukocytes together with squamous cells were recorded. Samples with squamous cells >20% were not progressed further. The majority of samples had cell viability >75%, but all samples were progressed with samples where RIN<6 removed later.

The cell suspension was adjusted to give a cell concentration of 1X106 with PBS. A 500ul sample was removed, centrifuged at 790 g for 10 mins at 4oC and resuspended in 700 µl of TriZol and vortexed before being frozen at -80oC.

Prior to running the ELISA assays for this study a series of robustness experiments were performed to assess matrix inference, standard curve precision, sample recovery  and linearity of sample dilution, this validated the assay as fit for purpose. The LLOQs and ULOQs were as follows; IL-6 (0.32-809), TNF-alpha (0.173-391) and IL-8 (2778-101015). Any data without of this range was not reported.

**Methodology for analysis for mRNA, quality control checks and pathway analysis**

Induced sputum RNA was extracted and hybridised using a balanced batch design by Expression Genomics (N.C., U.S.A.). RNA was extracted using QIAGEN RNeasy Mini Kit, and amplified using NuGen Pico kit, with 15ng of RNA per sample used as input, and 5ng DNA used as input for the Affy HG-U133 Plus 2.0 array. The quality of the data was assessed and then normalised using appropriate methodologies and software.

The microarray mRNA data was normalised using RMA in Array Studio v10.0 (Omicsoft). After normalisation, the data was quality assessed and any samples deemed as QC fails were excluded from any further analysis. This quality assessment involved looking for outlying signals in both the normalised expression data and the MAS5 QC metrics generated from each sample. If any samples were excluded, the remaining data was re-normalised. The output from the normalisation was log2 transformed mRNA intensity data (measured in arbitrary units).

Since the data was log2 transformed prior to the analysis, the treatment effects were expressed as ratios after back transformation (2^). These ratios can be converted from treatment ratios to fold change values as follows:

- If ratio ≥1 then fold change = ratio
- If ratio <1 then fold change = -1/ratio

The microarray data consisted of expression values (log2-transformed) derived from individual probe sets designed against transcripts of individual genes. More than one probe set could exist per gene. This analysis was conducted at the probe set level.

The mRNA data provided results for ~14000 genes encoded by ~54000 probe sets. To establish the PI3Kδ-dependent changes in previously identified immune cell mechanisms specifically related to neutrophil function using mRNA.

Alteration in previously identified immune cell mechanisms specifically related to neutrophil function was determined by changes in mRNA transcriptomics in the induced sputum after 12, 28 and 84 days of treatment by the analysis of mRNA intensities (logarithm base 2 scale) subset by the 638 probes identified.

To compare the expression value between treatments or time points for each probe set, repeated measures modelling analysis was performed separately for each subset of 638 probes with log2 (intensity) as the response variable. (Note: log2 [intensity] was also referred to as mRNA intensities [logarithm base 2 scale]). The model included terms for treatment group (All Placebo or All nemiralisib), time and a treatment group by time interaction. An unstructured (UN) covariance structure was to be fitted. The denominator degrees of freedom used in significance testing were computed using the Kenward Rogers approximation. The model was used to estimate the baseline-adjusted ratios for both the treatment groups calculated for Days 12, 28 and 84 along with the corresponding 95% confidence intervals and unadjusted p‑values. Additionally, baseline‑adjusted ratios of the change between active treatment and placebo were calculated along with 95% confidence intervals and unadjusted p‑values.

The following lists the different aspects of the microarray data that is checked to identify any samples that should be excluded from further analysis. Samples must be clear outliers in more than one metric before they are considered for exclusion. The decision on what samples to exclude is finalised before any differential gene analysis is conducted. The remaining samples are then re-normalised.

1. Check the chip images for blemishes including whether the images are very dark or bright.
2. Check the distribution of the raw intensities on each chip for any samples whose distribution is very different to the majority.
3. Check the distribution of the normalised intensities on each chip for any samples whose distribution is very different to the majority.
4. Generate a PCA of the normalised data and look for outlying samples while considering the design of the study. For example, a PCA involving both sputum and blood samples is likely to show separation between the two tissues and a sputum sample lying within the cluster of blood samples would raise concern of some sort of mislabelling. You would also make note of where multiple samples from the same donor lie in relation to each other e.g., if there are three outlying samples and they all belong to the same donor then they are not necessarily deemed to be outliers unless supported by some of the chip metrics.
5. Check various chip metrics such as MAS5 % present calls and GAPDH and B-Actin 3’ 5’ ratios to see if they confirm previously identified outliers.
6. Check various sample mRNA quality metrics such as yield and RIN to see if they confirm previously identified outliers.

An additional check that is done is to look at the expression of a male (DDX3Y) and female specific gene (XIST) to confirm that the expression levels match the sample gender information and where we have multiple samples from the same donor that the signals are consistent i.e., check we don’t have both male and female samples from the same donor. Any issues are then queried with the sample collection site which may lead to the exclusion of samples if no satisfactory reason for the inconsistency can be provided.

Results of the probe level differential expression analysis were loaded into either Ingenuity Pathway Analysis (IPA, version 49932394, January 2020, Qiagen Systems) or Metacore (version 6.21.66768, April 2015, Thomson Reuters). Probes were mapped to genes within the software and filtered at absolute 1.5 Fold Change and 0.05 pvalue to give lists called significant in each contrast of interest. Where more than one probe for a gene passed the significance cut-offs the highest absolute fold change was taken forward, as is common practice. False Discovery Rate adjusted p-values were not used as the study was underpowered to detect such changes.

Pathway enrichment level functional analysis was carried out within Ingenuity Pathway Analysis and Metacore using the built in algorithms and pathway databases. Significance cut-offs of -log(pvalue) 1.3 (IPA) and 0.05pvalue (Metacore) were applied.

The Affymetrix data from both studies is available on the National Center for Biotechnology Information Gene Expression Omnibus (GEO) GSE148871 and GSE148877.

**References**

1. Wilson R, Templeton A, Leemereise C, Eames R, Banham-Hall E, Hessel EM, Cahn A. Safety, Tolerability, and Pharmacokinetics of a New Formulation of Nemiralisib Administered via a Dry

**Supplement Tables**

**Supplement Table S1 - Patient demographics (Studies A and B)**

|  | **Study A (Stable COPD)** | | | **Study B (AECOPD)** | | |
| --- | --- | --- | --- | --- | --- | --- |
| **Demographics** | **Placebo**  **(N=7)** | **Nemiralisib**  **(N=21)** | **Total**  **(N=28)** | **Placebo**  **(N=22)** | **Nemiralisib**  **(N=22)** | **Total**  **(N=44)** |
| **Age in Years** [Mean (SD)] | 65.1 (5.81) | 60.5 (6.68) | 61.7 (6.68) | 64.0 (8.20) | 66.1 (7.32) | 65.1 (7.75) |
| **Age group (years)** [n (%)] |  |  |  |  |  |  |
| Min (years) | 55 | 50 | 50 | 47 | 46 | 46 |
| Max (years) | 71 | 75 | 75 | 77 | 78 | 78 |
| **Sex** [n (%)] |  |  |  |  |  |  |
| Female: | 1 (14) | 7 (33) | 8 (29) | 10 (45) | 11 (50) | 21 (48) |
| Male: | 6 (86) | 14 (77) | 20 (71) | 12 (55) | 11 (50) | 23 (52) |
| **BMI** (kg/m2) [Mean (SD)] | 26.39 (2.65) | 24.05 (2.99) | 24.64 (3.043) | 25.55 (4.789) | 25.98 (4.246) | 25.77 (4.478) |
| **Height** (cm) [Mean (SD)] | 172.1 (8.33) | 172.4 (8.64) | 172.3 (7.20) | 168.2 (8.14) | 168.1 (9.45) | 168.2 (8.71) |
| **Weight** (kg) [Mean (SD)] | 72.85 (15.881) | 73.41 (12.514) | 73.37 (11.497) | 72.26 (14.233) | 74.01 (16.665) | 73.14 (15.341) |
| **Ethnicity** [n (%)] |  |  |  |  |  |  |
| Not Hispanic or Latino: | 7 (100) | 21 (100) | 28 (100) | 22 (100) | 22 (100) | 44 (100) |
| **Race** [n (%)] |  |  |  |  |  |  |
| White – White/Caucasian/European Heritage | 7 (100) | 21 (100) | 28 (100) | 22 (100) | 22 (100) | 44 (100) |
| **Index Exacerbation Severity** [n (%)] |  |  |  |  |  |  |
| Number of subjects with index exacerbations not leading to hospitalisation | - | - | - | 20 (91) | 20 (91) | 40 (91) |
| Number of subjects with index exacerbations leading to hospitalisation | - | - | - | 2 (9) | 2 (9) | 4 (9) |

**Supplement Table S2 - Summary of common (≥5%) adverse events by device type (Study B)**

| **Preferred Term** | **Placebo DISKUS (N=14)** | **Nemiralisib DISKUS (N=14)** | **Placebo ELLIPTA (N=8)** | **Nemiralisib ELLIPTA (N=8)** |
| --- | --- | --- | --- | --- |
| Subjects with any adverse event(s), n (%) | 11 (79) | 11 (79) | 5 (63) | 5 (63) |
| Diarrhoea | 3 (21) | 2 (14) | 0 | 1 (13) |
| Headache | 1 (7) | 4 (29) | 1 (13) | 0 |
| Dyspnoea | 3 (21) | 1 (7) | 1 (13) | 0 |
| Nasopharyngitis | 1 (7) | 1 (7) | 1 (13) | 2 (25) |
| Back pain | 2 (14) | 1 (7) | 0 | 1 (13) |
| Pneumonia | 0 | 2 (14) | 2 (25) | 0 |
| Bronchospasm | 1 (7) | 1 (7) | 1 (13) | 0 |
| Chronic obstructive pulmonary disease | 0 | 2 (14) | 1 (13) | 0 |
| Cough | 0 | 2 (14) | 0 | 1 (13) |
| Musculoskeletal pain | 2 (14) | 1 (7) | 0 | 0 |
| Nausea | 0 | 1 (7) | 2 (25) | 0 |
| Oropharyngeal pain | 1 (7) | 1 (7) | 0 | 1 (13) |

**Supplement Table S3 – Total number of samples obtained from each study, those passing RIN≥6, and included in the analysis, and a breakdown by timepoint**

| **Study** | **Tissue** | **Total Number of Samples** | **Total Number of Samples RIN≥6** | **Number of samples included in analysis** | **Treatment Arm** | **Timepoint** | **Individual Analysed Samples RIN≥6** |
| --- | --- | --- | --- | --- | --- | --- | --- |
| **Study A** | Blood | 112 | 110 | 107 | Nemiralisib | Day -7 | 18 |
| Day 1 | 20 |
| Day 7 | 20 |
| Day 15 | 21 |
| Placebo | Day -7 | 6 |
| Day 1 | 7 |
| Day 7 | 7 |
| Day 15 | 7 |
| Sputum | 107 | 79 | 104 | Nemiralisib | Day -7 | 15 |
| Day 1 | 16 |
| Day 7 | 16 |
| Day 15 | 13 |
| Placebo | Day -7 | 6 |
| Day 1 | 4 |
| Day 7 | 5 |
| Day 15 | 4 |
| **Study B** | Blood | 168 | 167 | 167 | NR | screening | 5 |
| Nemiralisib | screening | 22 |
| Day 12 | 21 |
| Day 28 | 21 |
| Day 84 | 21 |
| Placebo | screening | 22 |
| Day 12 | 19 |
| Day 28 | 19 |
| Day 84 | 17 |
| Sputum | 136 | 103 | 101 | NR | screening | 1 |
| Nemiralisib | screening | 17 |
| Day 12 | 15 |
| Day 28 | 11 |
| Day 84 | 13 |
| Placebo | screening | 16 |
| Day 12 | 10 |
| Day 28 | 9 |
| Day 84 | 9 |

NR = Not Randomised, but were included in the baseline analysis

**Supplement Table S4 – List and source of panel of predefined neutrophil-related genes used as the primary endpoint in the study**

| **Clinical Trial Genes** | | **Metacore Neutrophil Annotated Genes** | | | | |
| --- | --- | --- | --- | --- | --- | --- |
| **COPD**  **Study A** | **HVT**  **FTIH**a | **IL-8**  **Neutrophil**  **Migration** | **IL-8**  **Neutrophil**  **Migration** | **Inhibition of**  **Neutrophil**  **Migration** | **Neutrophil Migration**  **In Asthma** | **Transcription**  **regulation**  **of granulocytes** |
| CD177 | PMAIP1 | AKT1 | GNAI1 | ADAM17 | BDKRB1 | RUNX1 |
| CXCR1 | S100P | AKT2 | GNAI2 | C5 | CCL15 | CEBPA |
| CXCR2 | PTGS2 | AKT3 | GNAI3 | C5AR1 | CCL2 | CEBPE |
| FPR2 | CCL20 | ACTA1 | GNAO1 | CCR5 | CCL5 | ANPEP |
| LTB4R | EGR3 | ACTA2 | GNAZ | CD34 | CCL7 | PTPRC |
| PAK1 | H1F0 | ACTB | GNB1 | CALM1 | CCR1 | E2F1 |
| PXN | NCOA3 | ACTC1 | GNB2 | CALM2 | CCR2 | CSF3 |
| PREX1 | TARP | ACTG1 | GNB3 | CALM3 | CCR3 | CSF3R |
| TLN1 | CEACAM1 | ACTG2 | GNB4 | FPR1 | CXCL5 | GATA1 |
| SSH2 | TTPAL | MYH1 | GNB5 | ICAM2 | CXCL1 | JAK1 |
| F2RL1 | VPS37B | MYH10 | GNG10 | IL1B | CXCL2 | JAK2 |
| TLR10 | SYAP1 | MYH11 | GNG11 | IL1R1 | CXCL3 | LRG1 |
| CEACAM3 | SPTBN1 | MYH13 | GNG12 | ITPR1 | HSPA14 | LTF |
| TREML2 | EGR1 | MYH14 | GNG13 | ITPR2 | HSPA1A | ELANE |
| DEFB124 | OSM | MYH15 | GNG2 | ITPR3 | HSPA1B | LYZ |
| CLEC4C | TBC1D22A | MYH16 | GNG3 | SELL | HSPA1L | MXD1 |
| IFITM1 |  | MYH2 | GNG4 | MSN | HSPA2 | MAX |
| CR1 |  | MYH3 | GNG5 | NKFB1 | HSPA4 | PRTN3 |
|  |  | MYH4 | GNG7 | NKFB2 | HSPA5 | MPO |
|  |  | MYH6 | GNG8 | REL | HSPA6 | SPI1 |
|  |  | MYH7 | GNGT1 | RELA | HSPA7 | RARA |
|  |  | MYH8 | GNGT2 | RELB | HSPA8 | RXRA |
|  |  | MYH9 | ICAM1 | PECAM1 | HSPA9 | SOCS3 |
|  |  | MYL1 | CXCL8 | PRKCA | MIF | STAT3 |
|  |  | MYL12A | ITGB2 | PRKCB | CCL3 | STAT5A |
|  |  | MYL12B | LIMK1 | PRKCD | PGF | STAT5B |
|  |  | MYL2 | MYLK | PRKCE | TAC1 | FES |
|  |  | MYL3 | MYLK2 | PRKCG | TACR1 | MYB |
|  |  | MYL4 | MYLK3 | PRKCH | KLK1 | MYC |
|  |  | MYL5 | PPP1CB | PRKCI | KLK10 | CYBB |
|  |  | MYL6 | PPP1R12A | PRKCQ | KLK11 | NCF1 |
|  |  | MYL6B | PDPK1 | PRKD1 | KLK12 | NCF2 |
|  |  | MYL7 | PIK3CG | PRKD2 | KLK13 |  |
|  |  | MYL9 | PIK3R5 | PRKD3 | KLK14 |  |
|  |  | MYLPF | PIP5K1A | PLCB2 | KLK15 |  |
|  |  | ACTN1 | PIP5K1B | PTAFR | KLK2 |  |
|  |  | ACTN2 | PIP5K1C | TLR2 | KLK3 |  |
|  |  | ACTN3 | PRKCZ | TLR4 | KLK4 |  |
|  |  | ACTN4 | PLD1 | TNFRSF1A | KLK5 |  |
|  |  | ACTR2 | PLPP6 | TNFRSF1B | KLK6 |  |
|  |  | ACTR3 | RAC1 | TNF | KLK7 |  |
|  |  | ACTR3B | RAC2 | VAV1 | KLK8 |  |
|  |  | ARPC1A | TLN2 | EZR | KLK9 |  |
|  |  | ARPC1B | ITGAL | VCL | FLT1 |  |
|  |  | ARPC2 |  | ITGAM |  |  |
|  |  | ARPC3 |  | ABL1 |  |  |
|  |  | ARPC4 |  | JUN |  |  |
|  |  | ARPC5 |  | FOS |  |  |
|  |  | CFL1 |  | MAPK11 |  |  |
|  |  | CFL2 |  | MAPK12 |  |  |
|  |  | MAPK1 |  | MAPK13 |  |  |
|  |  | MAPK3 |  | MAPK14 |  |  |

aHVT clinical trial was NCT01462617

**Supplement Table S5 - Summary of log-transformed plasma nemiralisib pharmacokinetic concentration - time data (pg/mL) by device type (PK population) (Study B)**

| **Visit** | **Planned**  **Time** | **Nemiralisib DISKUS**  **N=14** | | | | | **Nemiralisib ELLIPTA**  **N=8** | | | | |
| --- | --- | --- | --- | --- | --- | --- | --- | --- | --- | --- | --- |
| n | Geometric  means | 95% Cl | SD  (log) | CVb (%) | n | Geometric  means | 95% Cl | SD  (log) | CVb (%) |
| Day 1 | 5 min | 14 | 508.4 | 354.3, 729.5 | 0.63 | 69 | 7 | 1103.4 | 813.0, 1497.3 | 0.33 | 34 |
|  | 24 h | 8 | 313.9 | 195.6, 503.7 | 0.57 | 61 | 2 | - | 138.8, 665.2a | - | - |
| Day 12 | Predose | 9 | 1097.1 | 829.6, 1450.8 | 0.36 | 38 | 5 | 1077.2 | 810.7, 1431.1 | 0.23 | 23 |
| Day 28 | Predose | 9 | 1194.3 | 712.2, 2002.7 | 0.67 | 76 | 7 | 1225.8 | 790.3, 1901.3 | 0.47 | 50 |
| Day 56 | Predose | 11 | 1155.1 | 795.9, 1676.5 | 0.55 | 60 | 7 | 1171.6 | 765.7, 1792.6 | 0.46 | 49 |
| Day 84 | Predose | 11 | 1339.6 | 961.0, 1867.2 | 0.49 | 53 | 7 | 1058.2 | 785.3, 1425.9 | 0.32 | 33 |

aBoth values reported (as n=2)

CI: confidence interval; CVb: Coefficient of variation between patients; SD: standard deviation
Note: Subjects who did not complete dosing instructions as required were excluded from this summary.

**Supplement figures**

**Supplement Figure S1 - Study Schematic for Study B**


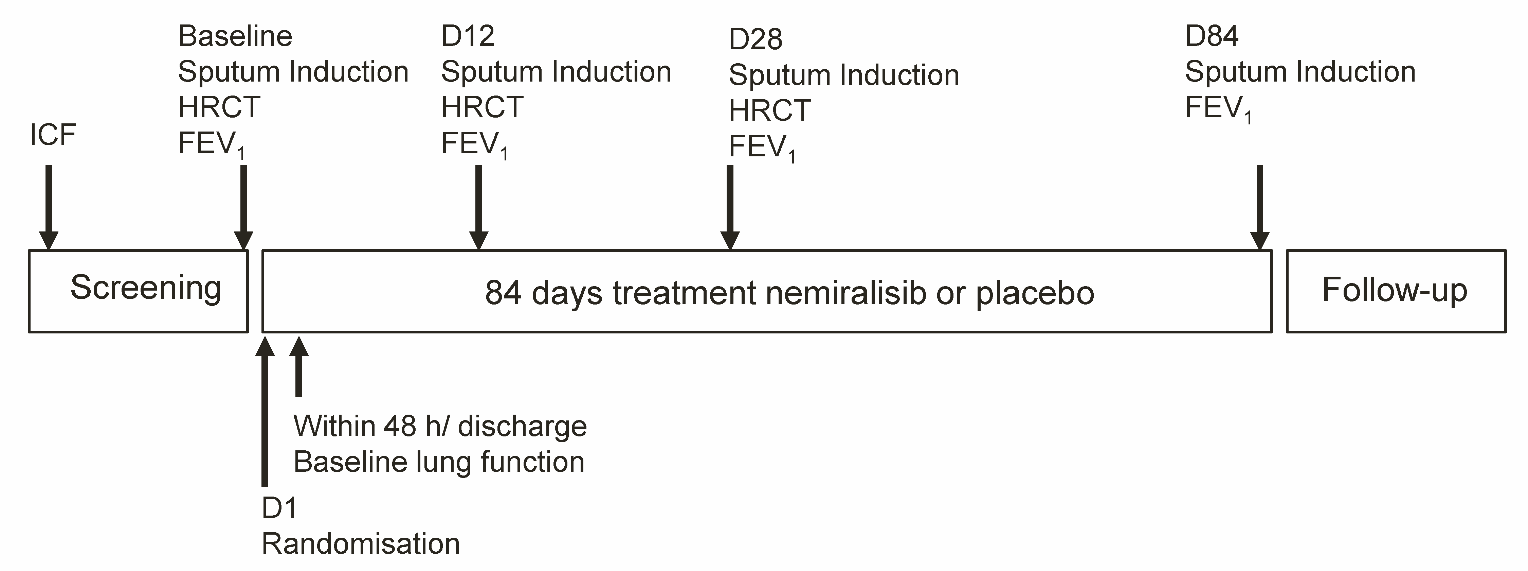


D: day; FEV1: forced expiratory volume 1 sec; HRCT: high resolution computed tomography; ICF: informed consent form

**Supplement Figure S2 - CONSORT diagram for Study B (NCT02522299; GSK Study 201928)**


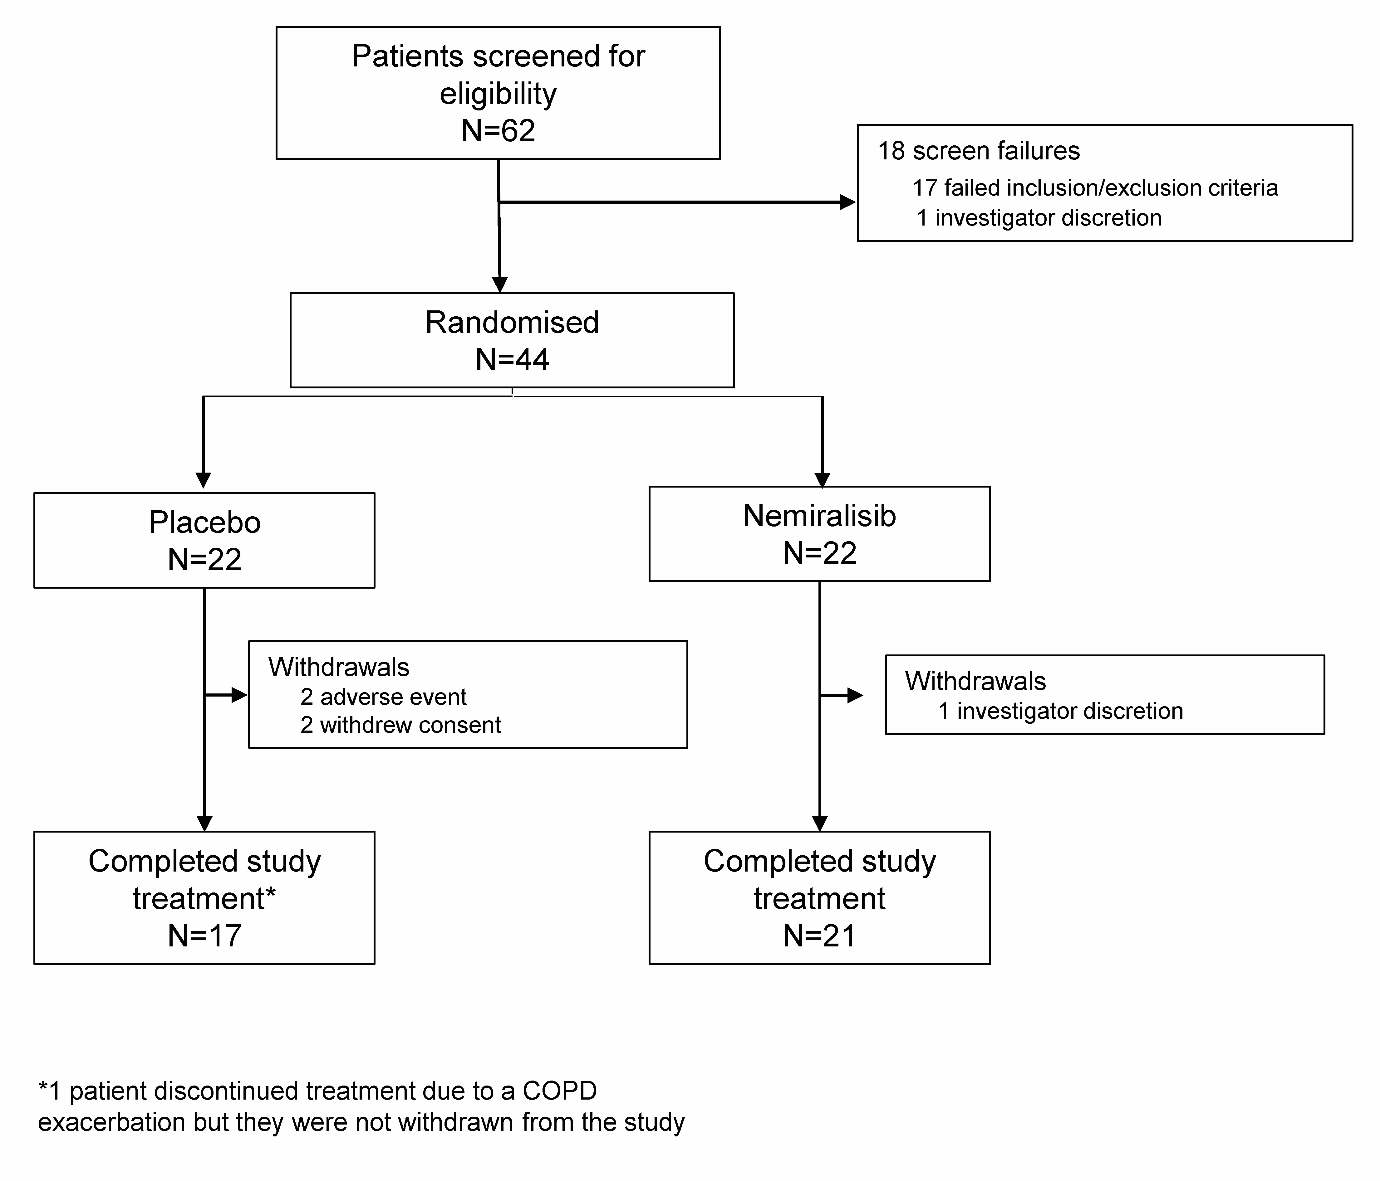


**Supplement Figure S3: Inflammatory mediator release from neutrophils in AECOPD patients (Study B)**

Nemiralisib inhibits the release of neutrophil elastase (left panel), and reactive oxygen species (ROS; right panel) from neutrophils isolated from the blood of COPD patients experiencing an acute exacerbation


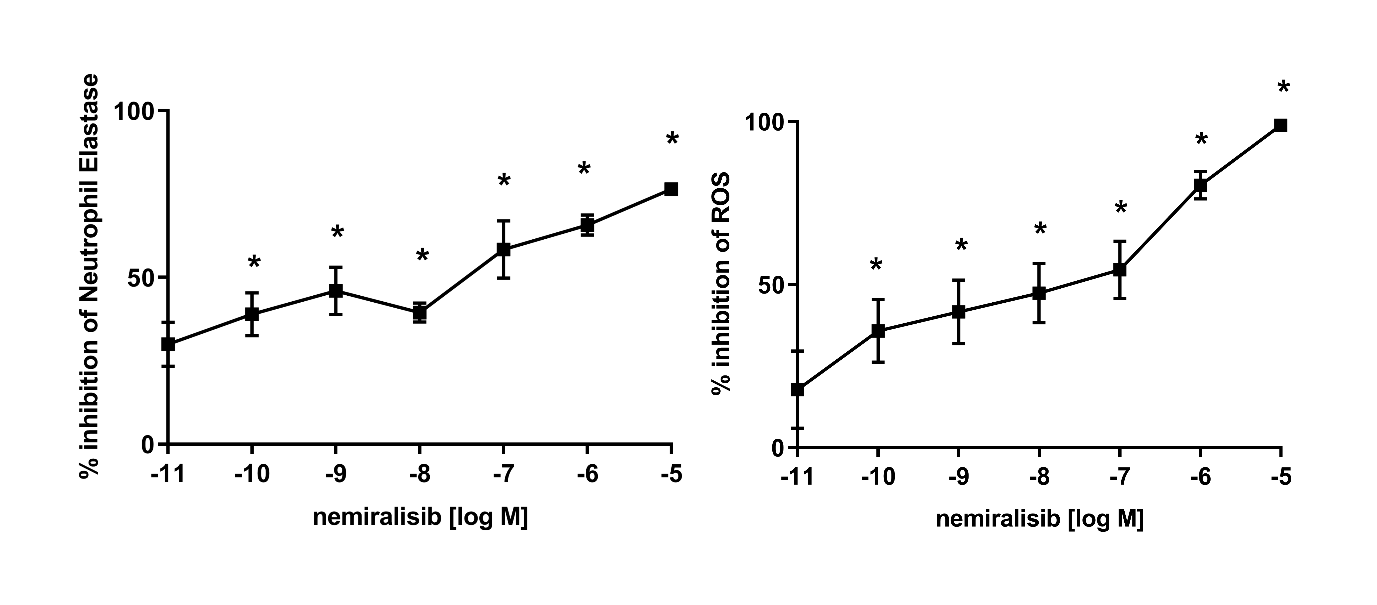


Note: The raw values obtained from the elastase or ROS release assay with varying concentrations of nemiralisib were independently normalised for each respective donor to a percentage inhibition value with respect to the no inhibitor (vehicle or “placebo” control)

**Appendix 1: Details of Ethics Committees/Institutional Review Boards (IRBs) (for centers where subjects enrolled)**

| **Study A (PII115119/(NCT02130635)** | |
| --- | --- |
| **Center** | **Name of Ethics Committee/IRB** |
| Parexel International Gesellschaft  mit beschränkter Haftung, Early  Phase Clinical Unit, Klinikum  Westend, Haus 17, Spandauer  Damm 130, Berlin, 14050,  Germany | Landesamt fuer Gesundheit und  Soziales Berlin, Geschäftsstelle  der Ethikkommission des Landes  Berlin, Fehrbelliner Platz 1, Berlin,  10707, Germany  Chairperson: Garbe, Edeltraut |
| Pneumologisches  Forschungsinstitut an der  LungenClinic Grosshansdorf  Gesellschaft mit beschränkter  Haftung, Woehrendamm 80,  Grosshansdorf, Schleswig-  Holstein, 22927, Germany | Ethikkommission der  Ärztekammer Schleswig-Holstein,  Bismarckallee 8-12, Bad  Segeberg, Berlin, 23795,  Germany  Chairperson: Ludwig, Diether |
|  |  |
|  |  |
| **Study B (201928/NCT02522299)** | |
| **Center** | **Name of Ethics committee/IRB** |
| Center for Innovative Medicine,  04.5243, 1001 Decarie  Boulevard, Montreal, Québec,  H4A 3J1, Canada | Comite d'ethique de la  recherche de l'hopital, 2725  Chemin Sainte-Foy, Quebec,  Québec, G1V 4G5, Canada |
| Vancouver General Hospital,  The Lung Centre, 7th Floor,  2775 Laurel Street, Vancouver,  British Columbia, V5Z 1M9,  Canada | University of British Columbia,  Clinical Research Ethics  Board, Room 210, 828 West  10th Avenue, Vancouver,  British Columbia, V5Z 1L8,  Canada |
| McMaster University, Health  Sciences Centre, Room 3U25,  1200 Main Street West,  Hamilton, Ontario, L8N 3Z5,  Canada | Hamilton Health Sciences  Research Ethics Board, Suite  102, 293 Wellington Street  North, Hamilton, Ontario, L8L  8E7, Canada |
| Institut universitaire de  Cardiologie et de Pneumologie  de Quebec, Centre de  Pneumologie, 2725 chemin  Saint Foy, Quebec, Québec,  G1V 4G5, Canada | Comite d'ethique de la  recherche de l'hopital, 2725  Chemin Sainte-Foy, Quebec,  Québec, G1V 4G5, Canada |
| Hotel-Dieu du Centre  Hospitalier de l'Université de  Montréal, Departement de  pneumologie, 3840 rue Saint  Urbain, Montreal, Québec,  H2W1T8, Canada | Comite d'ethique de la  recherche de l'hopital, 2725  Chemin Sainte-Foy, Quebec,  Québec, G1V 4G5, Canada |
| Odense Universitets Hospital,  Department of Respiratory  Medicine, Sdr. Boulevard 29,  Indgang 87-88, 5000 Odense  C, Denmark | De Videnskabsetiske Komitéer  for Region Hovedstaden,  Kongens Vaenge 2, Hillerød,  3400, Denmark |
